# Supplementary material for: PDK1 regulation of mTOR and hypoxia-inducible factor 1 integrate metabolism and migration of CD8+ T cells
Source: PubMed Central journal article supplement — J Exp Med. 2012 Dec 17;209(13):2441–53. doi: 10.1084/jem.20112607 (PMC3526360; doi:10.1084/jem.20112607), 2012-12-17
Supplement: supp_jem.20112607_JEM_20112607_sm.pdf [file supp_jem.20112607_JEM_20112607_sm.pdf]

Table S1.

| GENE_TITLE                                                                                     | GENE_SYMBOL | Fold change |
|------------------------------------------------------------------------------------------------|-------------|-------------|
| granzyme G                                                                                     | Gzmg        | 0.022349572 |
| spermatogenesis associated glutamate (E)-rich protein 1, pseudogene 1                          | Speer1-ps1  | 0.041886292 |
| scinderin                                                                                      | Scin        | 0.05434244  |
| granzyme C                                                                                     | Gzmc        | 0.0693013   |
| EGL nine homolog 3 (C. elegans)                                                                | Egln3       | 0.086142376 |
| granzyme F                                                                                     | Gzmf        | 0.08771586  |
| elastin microfibril interfacier 2                                                              | Emilin2     | 0.08810677  |
| lamin A                                                                                        | Lmna        | 0.0907633   |
| ankyrin repeat domain 37                                                                       | Ankrd37     | 0.09281252  |
| sema domain, transmembrane domain (TM), and cytoplasmic domain, (semaphorin) 6D                | Sema6d      | 0.09399207  |
| aldolase 3, C isoform                                                                          | Aldoc       | 0.11312253  |
| CD244 natural killer cell receptor 2B4                                                         | Cd244       | 0.12169029  |
| mast cell protease 8                                                                           | Mcpt8       | 0.12230821  |
| granzyme E                                                                                     | Gzme        | 0.12910424  |
| granzyme E                                                                                     | Gzme        | 0.14023377  |
| adenylate kinase 3 alpha-like 1                                                                | Ak3l1       | 0.14184158  |
| G protein-coupled receptor 87                                                                  | Gpr87       | 0.15319341  |
| ankyrin repeat and SOCS box-containing protein 2                                               | Asb2        | 0.15530644  |
| protein tyrosine phosphatase-like (proline instead of catalytic arginine), member a            | Ptpla       | 0.1553395   |
| granzyme D                                                                                     | Gzmd        | 0.15596193  |
| CD244 natural killer cell receptor 2B4                                                         | Cd244       | 0.15616353  |
| granzyme D                                                                                     | Gzmd        | 0.16912577  |
| acid phosphatase, prostate                                                                     | Acpp        | 0.17935582  |
| contactin 1                                                                                    | Cntn1       | 0.18297926  |
| Transcribed locus                                                                              | NA          | 0.18417175  |
| beta-1,4-N-acetyl-galactosaminyl transferase 2                                                 | B4galnt2    | 0.18624666  |
| acid phosphatase, prostate                                                                     | Acpp        | 0.19046073  |
| lectin, galactose binding, soluble 3                                                           | Lgals3      | 0.19627343  |
| BCL2/adenovirus E1B interacting protein 1, NIP3                                                | Bnip3       | 0.19629048  |
| leukotriene B4 receptor 1                                                                      | Ltb4r1      | 0.20736097  |
| Fc receptor, IgE, high affinity I, gamma polypeptide                                           | Fcer1g      | 0.20890664  |
| epithelial membrane protein 1                                                                  | Emp1        | 0.21824299  |
| phosphoinositide-3-kinase adaptor protein 1                                                    | Pik3ap1     | 0.2218947   |
| beta-1,4-N-acetyl-galactosaminyl transferase 2                                                 | B4galnt2    | 0.23149341  |
| immunoglobulin superfamily, member 5                                                           | Igsf5       | 0.2348817   |
| ring finger protein 128                                                                        | Rnf128      | 0.24516211  |
| aryl hydrocarbon receptor nuclear translocator 2                                               | Arnt2       | 0.24674654  |
| procollagen-proline, 2-oxoglutarate 4-dioxygenase (proline 4-hydroxylase), alpha 1 polypeptide | P4ha1       | 0.24757516  |
| solute carrier family 2 (facilitated glucose transporter), member 3                            | Slc2a3      | 0.25698838  |
| solute carrier family 2 (facilitated glucose transporter), member 3                            | Slc2a3      | 0.26122215  |
| phosphofructokinase, liver, B-type                                                             | Pfkl        | 0.26192176  |
| complement factor properdin                                                                    | Cfp         | 0.26209807  |
| nuclear factor, interleukin 3, regulated                                                       | Nfil3       | 0.26725787  |
| contactin 1                                                                                    | Cntn1       | 0.26879665  |
| integrin alpha 1                                                                               | Itga1       | 0.27301857  |
| hepatitis A virus cellular receptor 2                                                          | Havcr2      | 0.2730282   |
| cytokine-dependent hematopoietic cell linker                                                   | Clnk        | 0.27311115  |
| armadillo repeat containing, X-linked 2                                                        | Armxc2      | 0.27511358  |
| phosphotriesterase related                                                                     | Pter        | 0.29217827  |
| cysteine-rich secretory protein 1                                                              | Crisp1      | 0.2933864   |
| mcf.2 transforming sequence-like                                                               | Mcf2l       | 0.2963318   |
| glycine amidinotransferase (L-arginine:glycine amidinotransferase)                             | Gatm        | 0.2967492   |
| perforin 1 (pore forming protein)                                                              | Prf1        | 0.29793257  |
| tubulin, beta 6                                                                                | Tubb6       | 0.29971108  |
| death-associated kinase 2                                                                      | Dapk2       | 0.300007    |
| triosephosphate isomerase 1                                                                    | Tpi1        | 0.3056139   |
| GI/PC PDZ domain containing family, member 2                                                   | Gipc2       | 0.31883276  |
| activin A receptor, type II-like 1                                                             | Acvr1l      | 0.32581246  |
| saccharopine dehydrogenase (putative)                                                          | Sccpdh      | 0.32673156  |
| triosephosphate isomerase 1                                                                    | Tpi1        | 0.3284604   |
| triosephosphate isomerase 1                                                                    | Tpi1        | 0.33024433  |
| DIX domain containing 1                                                                        | Dixdc1      | 0.33155903  |
| calcium/calmodulin-dependent protein kinase II inhibitor 1                                     | Camk2n1     | 0.3469729   |
| protein tyrosine phosphatase-like (proline instead of catalytic arginine), member a            | Ptpla       | 0.3485868   |
| deafness, autosomal dominant 5 homolog (human)                                                 | Dfna5h      | 0.35120916  |
| histocompatibility 2, Q region locus 10                                                        | H2-Q10      | 0.3602173   |
| CD93 antigen                                                                                   | Cd93        | 0.362545    |
| pyruvate dehydrogenase kinase, isoenzyme 1                                                     | Pdk1        | 0.36361802  |
| pyruvate dehydrogenase kinase, isoenzyme 1                                                     | Pdk1        | 0.36432874  |
| killer cell lectin-like receptor subfamily B member 1C                                         | Klrb1c      | 0.36435556  |
| phospholipase C, gamma 2                                                                       | Plcg2       | 0.36485064  |
| synaptotagmin-like 3                                                                           | Syt13       | 0.36502412  |
| procollagen lysine, 2-oxoglutarate 5-dioxygenase 2                                             | Plod2       | 0.3663477   |
| procollagen lysine, 2-oxoglutarate 5-dioxygenase 2                                             | Plod2       | 0.36761722  |
| interleukin 24                                                                                 | Il24        | 0.36797148  |
| beta galactoside alpha 2,6 sialyltransferase 1                                                 | St6gal1     | 0.3725033   |
| myosin X                                                                                       | Myo10       | 0.38151824  |
| acid phosphatase, prostate                                                                     | Acpp        | 0.38270864  |
| CD93 antigen                                                                                   | Cd93        | 0.38360754  |
| Nephronectin                                                                                   | Npnt        | 0.38473997  |
| cathepsin G                                                                                    | CtsG        | 0.38673955  |
| regulator of G-protein signaling 16                                                            | Rgs16       | 0.3876166   |
| prion protein                                                                                  | Prnp        | 0.39173287  |
| interleukin 10                                                                                 | Il10        | 0.39743418  |
| S100 calcium binding protein A4                                                                | S100a4      | 0.3975539   |
| CD55 antigen                                                                                   | Cd55        | 0.39938667  |
| heparanase                                                                                     | Hpse        | 0.40051362  |
| glyoxylate reductase/hydroxypyruvate reductase                                                 | Grhpr       | 0.4057585   |

|                                                                                                |             |            |
|------------------------------------------------------------------------------------------------|-------------|------------|
| SH2 domain containing 5                                                                        | Sh2d5       | 0.4059925  |
| adenylate kinase 3 alpha-like 1                                                                | Ak311       | 0.4076276  |
| glial cells missing homolog 2 (Drosophila)                                                     | Gcm2        | 0.40993732 |
| pyruvate dehydrogenase kinase, isoenzyme 1                                                     | Pdk1        | 0.41071275 |
| protein phosphatase 1, regulatory (inhibitor) subunit 3B                                       | Ppp1r3b     | 0.41075274 |
| low density lipoprotein-related protein 12                                                     | Lrp12       | 0.41210243 |
| myosin X                                                                                       | Myo10       | 0.4128563  |
| beta-1,4-N-acetyl-galactosaminyl transferase 4                                                 | B4galnt4    | 0.4131853  |
| solute carrier family 24 (sodium/potassium/calcium exchanger), member 3                        | Slc24a3     | 0.41798025 |
| linker for activation of T cells family, member 2                                              | Lat2        | 0.42219752 |
| procollagen-proline, 2-oxoglutarate 4-dioxygenase (proline 4-hydroxylase), alpha 1 polypeptide | P4ha1       | 0.42446274 |
| DNA segment, Chr 10, Brigham & Women's Genetics 1379 expressed                                 | D10Bwg1379e | 0.4252878  |
| carbonic anhydrase 2                                                                           | Car2        | 0.4266965  |
| toll-interleukin 1 receptor (TIR) domain-containing adaptor protein                            | Tirap       | 0.42792618 |
| branched chain aminotransferase 1, cytosolic                                                   | Bcat1       | 0.43021077 |
| PRELI domain containing 2                                                                      | Prelid2     | 0.4303567  |
| solute carrier family 7 (cationic amino acid transporter, y+ system), member 3                 | Slc7a3      | 0.43109727 |
| ERO1-like (S. cerevisiae)                                                                      | Ero1l       | 0.4321244  |
| tumor necrosis factor receptor superfamily, member 9                                           | Tnfrsf9     | 0.4342641  |
| DnaJ (Hsp40) homolog, subfamily B, member 4                                                    | Dnajb4      | 0.43750677 |
| fumarylacetoacetate hydrolase                                                                  | Fah         | 0.43804836 |
| adavillin                                                                                      | Avil        | 0.43826777 |
| adaptor protein, phosphotyrosine interaction, PH domain and leucine zipper containing 2        | Appl2       | 0.44061616 |
| solute carrier organic anion transporter family, member 4a1                                    | Slco4a1     | 0.44169524 |
| kelch domain containing 2                                                                      | Klhdc2      | 0.44242325 |
| ERO1-like (S. cerevisiae)                                                                      | Ero1l       | 0.4425674  |
| ras homolog gene family, member Q                                                              | Rhoq        | 0.4439665  |
| v-myc myelocytomatosis viral related oncogene, neuroblastoma derived (avian)                   | Mycn        | 0.4444792  |
| phosphodiesterase 4D interacting protein (myomegalin)                                          | Pde4dip     | 0.44490287 |
| serine (or cysteine) peptidase inhibitor, clade E, member 2                                    | Serpine2    | 0.44527462 |
| histidine rich calcium binding protein                                                         | Hrc         | 0.44564846 |
| interleukin 1 receptor-like 1                                                                  | Il1rl1      | 0.4463537  |
| prion protein                                                                                  | Pmp         | 0.44800767 |
| kit oncogene                                                                                   | Kit         | 0.44817856 |
| glucan (1,4-alpha-), branching enzyme 1                                                        | Gbe1        | 0.44883177 |
| metallothionein 2                                                                              | Mt2         | 0.44930792 |
| stearoyl-Coenzyme A desaturase 1                                                               | Scd1        | 0.4504417  |
| CD55 antigen                                                                                   | Cd55        | 0.45097786 |
| ERO1-like (S. cerevisiae)                                                                      | Ero1l       | 0.45293248 |
| sprouty homolog 2 (Drosophila)                                                                 | Spry2       | 0.45487848 |
| tubby like protein 4                                                                           | Tulp4       | 0.45635757 |
| cathepsin Z                                                                                    | Ctsz        | 0.45730498 |
| hexokinase 2                                                                                   | Hk2         | 0.45770907 |
| metallothionein 1                                                                              | Mt1         | 0.45801923 |
| Nuclear receptor subfamily 4, group A, member 2                                                | Nr4a2       | 0.45958996 |
| glutamic pyruvate transaminase (alanine aminotransferase) 2                                    | Gpt2        | 0.459815   |
| transcription factor 4                                                                         | Tcf4        | 0.46001586 |
| glutamic pyruvate transaminase (alanine aminotransferase) 2                                    | Gpt2        | 0.4606217  |
| dynein light chain Tctex-type 3                                                                | Dynlt3      | 0.46451333 |
| CD160 antigen                                                                                  | Cd160       | 0.46867365 |
| dynein light chain Tctex-type 3                                                                | Dynlt3      | 0.4692398  |
| CD160 antigen                                                                                  | Cd160       | 0.4696155  |
| protein tyrosine phosphatase, receptor type, E                                                 | Ptpre       | 0.46967447 |
| jumonji, AT rich interactive domain 1B (Rbp2 like)                                             | Jarid1b     | 0.4699272  |
| Max interacting protein 1                                                                      | Mxi1        | 0.47005358 |
| ERBB receptor feedback inhibitor 1                                                             | Errfi1      | 0.4712709  |
| nuclear receptor subfamily 4, group A, member 2                                                | Nr4a2       | 0.47280297 |
| purinergic receptor P2Y, G-protein coupled 12                                                  | P2ry12      | 0.47498223 |
| myosin VI                                                                                      | Myo6        | 0.47537667 |
| metastasis suppressor 1                                                                        | Mtss1       | 0.47706193 |
| ectonucleoside triphosphate diphosphohydrolase 4                                               | Entpd4      | 0.47858235 |
| ectonucleoside triphosphate diphosphohydrolase 4                                               | Entpd4      | 0.47949937 |
| G protein-coupled receptor 68                                                                  | Gpr68       | 0.4798106  |
| nebulin                                                                                        | Neb         | 0.48159477 |
| meteorin, glial cell differentiation regulator-like                                            | Metrn1      | 0.48219597 |
| ribosomal protein L17                                                                          | Rpl17       | 0.4832163  |
| nuclear prelamins A recognition factor                                                         | Narf        | 0.4843662  |
| desmocollin 2                                                                                  | Dsc2        | 0.48448795 |
| kelch domain containing 2                                                                      | Klhdc2      | 0.4848613  |
| programmed cell death 1                                                                        | Pdcd1       | 0.48546597 |
| dynein light chain Tctex-type 3                                                                | Dynlt3      | 0.4858955  |
| crystallin, zeta (quinone reductase)-like 1                                                    | Cryzl1      | 0.48817927 |
| cathepsin Z                                                                                    | Ctsz        | 0.49158734 |
| DnaJ (Hsp40) homolog, subfamily B, member 4                                                    | Dnajb4      | 0.49309114 |
| ring finger protein 128                                                                        | Rnf128      | 0.4932107  |
| enolase 1, alpha non-neuron                                                                    | Eno1        | 0.4936751  |
| vasohibin 1                                                                                    | Vash1       | 0.4956313  |
| phosphoglycerate mutase 1                                                                      | Pgam1       | 0.4958437  |
| metastasis suppressor 1                                                                        | Mtss1       | 0.49593103 |
| polycystic kidney disease 2                                                                    | Pkd2        | 0.49673474 |
| myosin X                                                                                       | Myo10       | 0.4976237  |
| enolase 1, alpha non-neuron                                                                    | Eno1        | 0.5001413  |
| EGL nine homolog 3 (C. elegans)                                                                | Egln3       | 0.5003151  |
| adenylosuccinate synthetase like 1                                                             | Adssl1      | 0.5016911  |
| galactokinase 1                                                                                | Galk1       | 0.50175935 |
| pyrroline-5-carboxylate reductase 1                                                            | Pycr1       | 0.5024794  |
| SH2 domain containing 5                                                                        | Sh2d5       | 0.5029855  |
| piwi-like homolog 2 (Drosophila)                                                               | Piwil2      | 0.50410473 |
| tumor necrosis factor receptor superfamily, member 9                                           | Tnfrsf9     | 0.50458443 |

|                                                                                               |             |            |
|-----------------------------------------------------------------------------------------------|-------------|------------|
| solute carrier family 2 (facilitated glucose transporter), member 1                           | Slc2a1      | 0.50727916 |
| myristoylated alanine rich protein kinase C substrate                                         | Marcks      | 0.5074356  |
| aryl hydrocarbon receptor nuclear translocator                                                | Arnt        | 0.50895375 |
| plakophilin 2                                                                                 | Pkp2        | 0.5099554  |
| histone cluster 1, H1c                                                                        | Hist1h1c    | 0.5113115  |
| secretory carrier membrane protein 1                                                          | Scamp1      | 0.51146215 |
| zinc finger protein 608                                                                       | Zfp608      | 0.5132395  |
| endothelial PAS domain protein 1                                                              | Epas1       | 0.51366055 |
| branched chain aminotransferase 1, cytosolic                                                  | Bcat1       | 0.5139056  |
| abhydrolase domain containing 14A                                                             | Abhd14a     | 0.51417804 |
| solute carrier family 25, member 33                                                           | Slc25a33    | 0.5143665  |
| tetraspanin 4                                                                                 | Tspan4      | 0.5154551  |
| aryl-hydrocarbon receptor repressor                                                           | Ahrr        | 0.5158349  |
| DNA-damage-inducible transcript 4                                                             | Ddit4       | 0.5172011  |
| regulator of G-protein signaling 16                                                           | Rgs16       | 0.5212191  |
| catenin (cadherin associated protein), delta 2                                                | Ctnnd2      | 0.521302   |
| ARP3 actin-related protein 3 homolog B (yeast)                                                | Actr3b      | 0.52169836 |
| histone cluster 1, H1c                                                                        | Hist1h1c    | 0.52186245 |
| X-linked lymphocyte-regulated 3A                                                              | Xlr3a       | 0.5239651  |
| enolase 1, alpha non-neuron                                                                   | Eno1        | 0.52470213 |
| armadillo repeat containing, X-linked 4                                                       | Armxc4      | 0.527587   |
| nuclear receptor subfamily 4, group A, member 3                                               | Nr4a3       | 0.5281822  |
| SWA-70 protein                                                                                | Swap70      | 0.5284148  |
| histocompatibility 2, class II antigen A, beta 1                                              | H2-Ab1      | 0.5284654  |
| inducible T-cell co-stimulator                                                                | Icos        | 0.52897793 |
| transmembrane protein 37                                                                      | Tmem37      | 0.52943724 |
| transmembrane protein 40                                                                      | Tmem40      | 0.5298972  |
| proviral integration site 3                                                                   | Pim3        | 0.5302893  |
| tumor necrosis factor (ligand) superfamily, member 9                                          | Tnfsf9      | 0.5325396  |
| proviral integration site 3                                                                   | Pim3        | 0.5338104  |
| tribbles homolog 3 (Drosophila)                                                               | Trib3       | 0.5338888  |
| cathepsin Z                                                                                   | Ctsz        | 0.534321   |
| pyruvate kinase, muscle                                                                       | Pkm2        | 0.53495544 |
| interleukin 7 receptor                                                                        | Il7r        | 0.5350367  |
| DNA segment, Chr 10, Brigham & Women's Genetics 1379 expressed                                | D10Bwg1379e | 0.53689957 |
| tribbles homolog 3 (Drosophila)                                                               | Trib3       | 0.5384706  |
| solute carrier family 1 (glutamate/neutral amino acid transporter), member 4                  | Slc1a4      | 0.5392019  |
| solute carrier family 2 (facilitated glucose transporter), member 1                           | Slc2a1      | 0.5392878  |
| carbonic anhydrase 12                                                                         | Car12       | 0.53945845 |
| vasohibin 1                                                                                   | Vash1       | 0.5405774  |
| ribosomal protein S9                                                                          | Rps9        | 0.5405814  |
| crystallin, zeta                                                                              | Cryz        | 0.54070765 |
| profilin 2                                                                                    | Pfn2        | 0.541161   |
| activin A receptor, type II-like 1                                                            | Acvr11      | 0.5425597  |
| Jumonji domain containing 3                                                                   | Jmjd3       | 0.54416376 |
| AU RNA binding protein/enoyl-coenzyme A hydratase                                             | Auh         | 0.5460162  |
| transmembrane protein 40                                                                      | Tmem40      | 0.5464679  |
| dynein light chain Tctex-type 3                                                               | Dynlt3      | 0.54669815 |
| regulator of G-protein signaling 16                                                           | Rgs16       | 0.54765916 |
| cytochrome c oxidase, subunit VIIa 1                                                          | Cox7a1      | 0.54810387 |
| transcription factor 4                                                                        | Tcf4        | 0.54824257 |
| solute carrier family 16 (monocarboxylic acid transporters), member 10                        | Slc16a10    | 0.549167   |
| stearoyl-Coenzyme A desaturase 1                                                              | Scd1        | 0.5512933  |
| a disintegrin and metallopeptidase domain 8                                                   | Adam8       | 0.5513253  |
| shroom family member 3                                                                        | Shroom3     | 0.5520802  |
| histone cluster 1, H3b                                                                        | Hist1h3b    | 0.5523739  |
| centaurin, delta 3                                                                            | Centd3      | 0.55352837 |
| serine/threonine kinase 3 (Ste20, yeast homolog)                                              | Stk3        | 0.5550694  |
| Transcribed locus                                                                             | NA          | 0.5555409  |
| 1-acylglycerol-3-phosphate O-acyltransferase 4 (lysophosphatidic acid acyltransferase, delta) | Agpat4      | 0.5556009  |
| macrophage migration inhibitory factor                                                        | Mif         | 0.55595183 |
| monocyte to macrophage differentiation-associated                                             | Mmd         | 0.5562639  |
| immediate early response 3                                                                    | Ier3        | 0.55631393 |
| interferon induced transmembrane protein 1                                                    | Ifitm1      | 0.55668634 |
| polycystic kidney disease 2                                                                   | Pkd2        | 0.55670595 |
| myosin IE                                                                                     | Myo1e       | 0.55698866 |
| tumor protein D52                                                                             | Tpd52       | 0.55706286 |
| pyruvate carboxylase                                                                          | Pcx         | 0.5583524  |
| beta-1,4-N-acetyl-galactosaminyl transferase 2                                                | B4galnt2    | 0.5598514  |
| Metastasis associated lung adenocarcinoma transcript 1 (non-coding RNA)                       | Malat1      | 0.55991477 |
| solute carrier family 25 (mitochondrial carrier ornithine transporter), member 15             | Slc25a15    | 0.56070495 |
| nephronectin                                                                                  | Npnt        | 0.56100494 |
| solute carrier family 2 (facilitated glucose transporter), member 1                           | Slc2a1      | 0.56182414 |
| 1-acylglycerol-3-phosphate O-acyltransferase 4 (lysophosphatidic acid acyltransferase, delta) | Agpat4      | 0.56182575 |
| guanine nucleotide binding protein, alpha 15                                                  | Gna15       | 0.5622317  |
| carbonic anhydrase 5b, mitochondrial                                                          | Car5b       | 0.562929   |
| inducible T-cell co-stimulator                                                                | Icos        | 0.5634652  |
| myristoylated alanine rich protein kinase C substrate                                         | Marcks      | 0.56441456 |
| cysteinyl leukotriene receptor 1                                                              | Cysltr1     | 0.56475085 |
| tumor protein D52                                                                             | Tpd52       | 0.5661901  |
| exportin, tRNA (nuclear export receptor for tRNAs)                                            | Xpot        | 0.5664675  |
| tumor necrosis factor receptor superfamily, member 21                                         | Tnfrsf21    | 0.56660765 |
| FERM domain containing 4A                                                                     | Frdm4a      | 0.56840765 |
| Ribosomal protein S17                                                                         | Rps17       | 0.5700595  |
| secreted phosphoprotein 1                                                                     | Spp1        | 0.5709837  |
| solute carrier organic anion transporter family, member 4a1                                   | Slco4a1     | 0.5723526  |
| aldolase 1, A isoform                                                                         | Aldoa       | 0.57370234 |
| DnaJ (Hsp40) homolog, subfamily C, member 12                                                  | Dnajc12     | 0.57430524 |
| small nucleolar RNA, H/ACA box 65                                                             | Snora65     | 0.5751461  |

|                                                                                              |                 |            |
|----------------------------------------------------------------------------------------------|-----------------|------------|
| RAB27b, member RAS oncogene family                                                           | Rab27b          | 0.57543087 |
| sperm associated antigen 1                                                                   | Spag1           | 0.57665324 |
| thioredoxin-like 4                                                                           | Txn14           | 0.5774266  |
| transmembrane protein 30A                                                                    | Tmem30a         | 0.57751834 |
| FAST kinase domains 1                                                                        | Fastkd1         | 0.5775361  |
| aldolase 1, A isoform                                                                        | Aldoa           | 0.5780724  |
| v-ral simian leukemia viral oncogene homolog B (ras related)                                 | Ralb            | 0.57858443 |
| expressed sequence AI747699                                                                  | AI747699        | 0.5787854  |
| sprouty homolog 4 (Drosophila)                                                               | Spry4           | 0.57886994 |
| Metastasis associated lung adenocarcinoma transcript 1 (non-coding RNA)                      | Malat1          | 0.5797027  |
| dihydrouridine synthase 4-like (S. cerevisiae)                                               | Dus4l           | 0.58036196 |
| coiled-coil domain containing 58                                                             | Ccdc58          | 0.58120453 |
| dCMP deaminase                                                                               | Dctd            | 0.58166355 |
| crystallin, zeta (quinone reductase)-like 1                                                  | Cryz1l          | 0.58188695 |
| coiled-coil domain containing 90B                                                            | Ccdc90b         | 0.582047   |
| aldolase 1, A isoform                                                                        | Aldoa           | 0.58286315 |
| scavenger receptor class B, member 1                                                         | Scarb1          | 0.58444124 |
| growth arrest specific 5                                                                     | Gas5            | 0.584723   |
| jumonji domain containing 3                                                                  | Jmjd3           | 0.5872649  |
| myristoylated alanine rich protein kinase C substrate                                        | Marcks          | 0.5875765  |
| purinergic receptor P2Y, G-protein coupled, 5                                                | P2ry5           | 0.5880999  |
| spermatogenesis associated, serine-rich 2                                                    | Spats2          | 0.58839005 |
| aldolase 1, A isoform                                                                        | Aldoa           | 0.588652   |
| eukaryotic translation initiation factor 4E binding protein 1                                | Eif4ebp1        | 0.59041613 |
| protein kinase, interferon inducible double stranded RNA dependent activator                 | Prkra           | 0.59085554 |
| small nucleolar RNA, C/D box 22                                                              | Snord22         | 0.59092647 |
| phosphoglycerate kinase 1                                                                    | Pgk1            | 0.59111165 |
| AU RNA binding protein/enoyl-coenzyme A hydratase                                            | Auh             | 0.59145254 |
| SWA-70 protein                                                                               | Swap70          | 0.59150577 |
| tetratricopeptide repeat, ankyrin repeat and coiled-coil containing 1                        | Tanc1           | 0.59265375 |
| growth arrest specific 5                                                                     | Gas5            | 0.59296745 |
| SLIT-ROBO Rho GTPase activating protein 3                                                    | Srgap3          | 0.5931792  |
| pre B-cell leukemia transcription factor 3                                                   | Pbx3            | 0.59358877 |
| monocyte to macrophage differentiation-associated                                            | Mmd             | 0.5937208  |
| solute carrier family 25 (mitochondrial carrier, adenine nucleotide translocator), member 13 | Slc25a13        | 0.59374434 |
| proviral integration site 2                                                                  | Pim2            | 0.5940653  |
| sterol-C4-methyl oxidase-like                                                                | Sc4mol          | 0.59449404 |
| aryl-hydrocarbon receptor                                                                    | Ahr             | 0.5945315  |
| importin 4                                                                                   | Ipo4            | 0.5950052  |
| 3-hydroxy-3-methylglutaryl-Coenzyme A synthase 1                                             | Hmgcs1          | 0.59545267 |
| ubiquitin-conjugating enzyme E2Q (putative) 2                                                | Ube2q2          | 0.5960568  |
| integrin beta 3                                                                              | Itgb3           | 0.5962849  |
| ChaC, cation transport regulator-like 1 (E. coli)                                            | Chac1           | 0.59662503 |
| solute carrier family 16 (monocarboxylic acid transporters), member 3                        | Slc16a3         | 0.59662753 |
| breakpoint cluster region homolog                                                            | Bcr             | 0.5967212  |
| triggering receptor expressed on myeloid cells-like 2                                        | Trem12          | 0.5972635  |
| Transcribed locus                                                                            | NA              | 0.5977485  |
| opioid receptor, sigma 1                                                                     | Oprs1           | 0.59820575 |
| tetraspanin 9                                                                                | Tspan9          | 0.59836364 |
| annexin A5                                                                                   | Anxa5           | 0.5996279  |
| toll-interleukin 1 receptor (TIR) domain-containing adaptor protein                          | Tirap           | 0.6000086  |
| NA                                                                                           | NA              | 0.60017574 |
| serum/glucocorticoid regulated kinase                                                        | Sgk             | 0.6009653  |
| pyruvate carboxylase                                                                         | Pcx             | 0.6012593  |
| protein phosphatase 1, regulatory (inhibitor) subunit 14c                                    | Ppp1r14c        | 0.6028952  |
| G patch domain containing 4                                                                  | Gpatch4         | 0.60303926 |
| solute carrier family 39 (zinc transporter), member 10                                       | Slc39a10        | 0.60356224 |
| kelch-like 17 (Drosophila)/pleckstrin homology domain containing, family N member 1          | Klh17///Plekhn1 | 0.6037337  |
| platelet-activating factor acetylhydrolase, isoform 1b, alpha1 subunit                       | Pafah1b3        | 0.6040435  |
| G protein-coupled receptor 97                                                                | Gpr97           | 0.604422   |
| glucosaminyl (N-acetyl) transferase 1, core 2                                                | Gcnt1           | 0.6046435  |
| exportin, tRNA (nuclear export receptor for tRNAs)                                           | Xpot            | 0.60487765 |
| CD160 antigen                                                                                | Cd160           | 0.60736626 |
| ninjurin 1                                                                                   | Ninj1           | 0.6076785  |
| apurinic/aprimidinic endonuclease 1                                                          | Apex1           | 0.6081227  |
| sphingomyelin phosphodiesterase 1, acid lysosomal                                            | Smpd1           | 0.60832965 |
| Potassium voltage-gated channel, subfamily Q, member 5                                       | Kcnq5           | 0.60910934 |
| dual specificity phosphatase 14                                                              | Dusp14          | 0.6091096  |
| hydroxysteroid (17-beta) dehydrogenase 10                                                    | Hsd17b10        | 0.609857   |
| stanniocalcin 2                                                                              | Stc2            | 0.6103889  |
| inducible T-cell co-stimulator                                                               | Icos            | 0.61053246 |
| activated leukocyte cell adhesion molecule                                                   | Alcam           | 0.61094695 |
| ribonuclease P 40 subunit (human)                                                            | Rpp40           | 0.61217546 |
| phosphoglycerate kinase 1                                                                    | Pgk1            | 0.6125413  |
| capping protein (actin filament), gelsolin-like                                              | Capg            | 0.6132278  |
| tight junction protein 2                                                                     | Tjp2            | 0.61337346 |
| TYRO protein tyrosine kinase binding protein                                                 | Tyrobp          | 0.61438984 |
| NIMA (never in mitosis gene a)-related expressed kinase 1                                    | Nek1            | 0.61603355 |
| abhydrolase domain containing 5                                                              | Abhd5           | 0.61605495 |
| v-myc myelocytomatosis viral related oncogene, neuroblastoma derived (avian)                 | Mycn            | 0.61736304 |
| RIKEN cDNA 5033413D16 gene                                                                   | 5033413D16Rik   | 0.617498   |
| adenosine A3 receptor                                                                        | Adora3          | 0.6175564  |
| apurinic/aprimidinic endonuclease 1                                                          | Apex1           | 0.6176607  |
| lactate dehydrogenase A                                                                      | Ldha            | 0.61801744 |
| forty-two-three domain containing 1                                                          | Fyttd1          | 0.61827815 |
| CD96 antigen                                                                                 | Cd96            | 0.6185967  |
| stanniocalcin 2                                                                              | Stc2            | 0.6195668  |
| nuclear transcription factor, X-box binding-like 1                                           | Nfxl1           | 0.6202423  |
| annexin A4                                                                                   | Anxa4           | 0.6206796  |

|                                                                                  |          |            |
|----------------------------------------------------------------------------------|----------|------------|
| major facilitator superfamily domain containing 2                                | Mfsd2    | 0.62121916 |
| elongation factor RNA polymerase II 2                                            | Eli2     | 0.6219092  |
| BCL2/adenovirus E1B interacting protein 3-like                                   | Bnip3l   | 0.6219833  |
| hydroxysteroid (17-beta) dehydrogenase 10                                        | Hsd17b10 | 0.62233764 |
| opioid receptor, sigma 1                                                         | Oprs1    | 0.6228127  |
| AU RNA binding protein/enoyl-coenzyme A hydratase                                | Auh      | 0.6233038  |
| transmembrane protein 40                                                         | Tmem40   | 0.62370014 |
| apurinic/apyrimidinic endonuclease 1                                             | Apex1    | 0.623918   |
| DNA topoisomerase 1, mitochondrial                                               | Top1mt   | 0.62482184 |
| solute carrier family 16 (monocarboxylic acid transporters), member 10           | Slc16a10 | 0.6256036  |
| RAB27b, member RAS oncogene family                                               | Rab27b   | 0.62661    |
| basigin                                                                          | Bsg      | 0.6270878  |
| expressed sequence AI316787                                                      | AI316787 | 0.6271468  |
| eukaryotic translation initiation factor 4E binding protein 1                    | Eif4ebp1 | 0.6276931  |
| glyceraldehyde-3-phosphate dehydrogenase                                         | Gapdh    | 0.62807614 |
| neurolysin (metallopeptidase M3 family)                                          | Nln      | 0.6281102  |
| phosphofructokinase, liver, B-type                                               | Pfkl     | 0.62823325 |
| monocyte to macrophage differentiation-associated                                | Mmd      | 0.62859124 |
| cell growth regulator with ring finger domain 1                                  | Cgrrf1   | 0.62906826 |
| protein phosphatase 2 (formerly 2A), regulatory subunit B (PR 52), gamma isoform | Ppp2r2c  | 0.62991124 |
| zinc finger protein 52                                                           | Zfp52    | 0.62993675 |
| tight junction protein 2                                                         | Tjp2     | 0.6303304  |
| tight junction protein 1                                                         | Tjp1     | 0.6313458  |
| RAN guanine nucleotide release factor                                            | Rangrf   | 0.63162476 |
| zinc finger protein 69                                                           | Zfp69    | 0.63224626 |
| cDNA sequence D10627                                                             | D10627   | 0.6331447  |
| mevalonate (diphospho) decarboxylase                                             | Mvd      | 0.63334143 |
| lanosterol synthase                                                              | Lss      | 0.6336675  |
| growth arrest and DNA-damage-inducible 45 gamma                                  | Gadd45g  | 0.6351033  |
| carbohydrate sulfotransferase 11                                                 | Chst11   | 0.6351188  |
| small nucleolar RNA, C/D box 22                                                  | Snord22  | 0.6353658  |
| Bcl2-associated athanogene 2                                                     | Bag2     | 0.6355403  |
| cysteine conjugate-beta lyase 2                                                  | Ccbl2    | 0.6356338  |
| phosphoenolpyruvate carboxykinase 2 (mitochondrial)                              | Pck2     | 0.63611376 |
| Mus musculus, clone IMAGE:4219318, mRNA                                          | NA       | 0.63629556 |
| TBC1D12: TBC1 domain family, member 12                                           | Tbc1d12  | 0.6372191  |
| asparagine synthetase                                                            | Asns     | 0.6391549  |
| zinc finger, SWIM domain containing 6                                            | Zswim6   | 0.63919336 |
| myristoylated alanine rich protein kinase C substrate                            | Marcks   | 0.6392387  |
| Myristoylated alanine rich protein kinase C substrate                            | Marcks   | 0.6394435  |
| poly (ADP-ribose) polymerase family, member 16                                   | Parp16   | 0.64045846 |
| 3-hydroxy-3-methylglutaryl-Coenzyme A synthase 1                                 | Hmgcs1   | 0.6405402  |
| branched chain ketoacid dehydrogenase E1, beta polypeptide                       | Bckdhb   | 0.6412341  |
| serine (or cysteine) peptidase inhibitor, clade B, member 1b                     | Serpib1b | 0.64292747 |
| 3-hydroxy-3-methylglutaryl-Coenzyme A synthase 1                                 | Hmgcs1   | 0.6432873  |
| small nucleolar RNA host gene (non-protein coding) 3                             | Shhg3    | 0.6432996  |
| family with sequence similarity 18, member B                                     | Fam18b   | 0.6433753  |
| growth arrest specific 5                                                         | Gas5     | 0.64358014 |
| alpha fetoprotein                                                                | Afp      | 0.64368594 |
| solute carrier family 37 (glucose-6-phosphate transporter), member 4             | Slc37a4  | 0.6438727  |
| small nucleolar RNA host gene (non-protein coding) 7                             | Shhg7    | 0.64400566 |
| protein phosphatase 1, regulatory (inhibitor) subunit 13 like                    | Ppp1r13l | 0.6446592  |
| ATP-binding cassette, sub-family B (MDR/TAP), member 9                           | Abcb9    | 0.6449137  |
| trafficking protein particle complex 6A                                          | Trappc6a | 0.6454556  |
| PDZ and LIM domain 7                                                             | Pdlim7   | 0.6458128  |
| spermidine synthase                                                              | Srm      | 0.645882   |
| asparagine synthetase                                                            | Asns     | 0.64643997 |
| aldehyde dehydrogenase family 7, member A1                                       | Aldh7a1  | 0.64659935 |
| dodecenoyl-Coenzyme A delta isomerase (3,2 trans-enoyl-Coenzyme A isomerase)     | Dci      | 0.6466948  |
| transcription factor 4                                                           | Tcf4     | 0.6471856  |
| UDP-N-acetyl-alpha-D-galactosamine:polypeptide N-acetylglucosaminyltransferase 6 | Galnt6   | 0.6475366  |
| spindlin family, member 4                                                        | Spin4    | 0.64781487 |
| Rho GTPase activating protein 8                                                  | Arhgap8  | 0.6478622  |
| solute carrier family 39 (zinc transporter), member 14                           | Slc39a14 | 0.6487392  |
| forty-two-three domain containing 1                                              | Fytd1    | 0.6488945  |
| solute carrier family 19 (sodium/hydrogen exchanger), member 1                   | Slc19a1  | 0.6491613  |
| arginine vasopressin-induced 1                                                   | Avpi1    | 0.6501877  |
| small nucleolar RNA, C/D box 22                                                  | Snord22  | 0.65094554 |
| annexin A3                                                                       | Anxa3    | 0.6510268  |
| coiled-coil domain containing 132                                                | Ccdc132  | 0.65110487 |
| 3-hydroxy-3-methylglutaryl-Coenzyme A synthase 1                                 | Hmgcs1   | 0.65111375 |
| CDC14 cell division cycle 14 homolog B (S. cerevisiae)                           | Cdc14b   | 0.65173113 |
| sorting nexin 9                                                                  | Snx9     | 0.6518183  |
| ATG9 autophagy related 9 homolog B (S. cerevisiae)                               | Atg9b    | 0.6519335  |
| activating transcription factor 4                                                | Atf4     | 0.6522638  |
| claudin 12                                                                       | Cldn12   | 0.652276   |
| poliovirus receptor                                                              | Pvr      | 0.65236604 |
| solute carrier family 19 (sodium/hydrogen exchanger), member 1                   | Slc19a1  | 0.65238047 |
| nuclear undecaprenyl pyrophosphate synthase 1 homolog (S. cerevisiae)            | Nus1     | 0.65238976 |
| activating transcription factor 4                                                | Atf4     | 0.6537279  |
| SEC63-like (S. cerevisiae)                                                       | Sec63    | 0.65432286 |
| alpha fetoprotein                                                                | Afp      | 0.6543817  |
| coiled-coil domain containing 86                                                 | Ccdc86   | 0.6544868  |
| G patch domain containing 4                                                      | Gpatch4  | 0.65452504 |
| homeobox only domain                                                             | Hod      | 0.65455645 |
| retinoic acid induced 14                                                         | Rai14    | 0.65471    |
| phosphatidylethanolamine binding protein 1                                       | Pebp1    | 0.655803   |
| ets variant gene 5                                                               | Etv5     | 0.65586853 |
| solute carrier family 39 (metal ion transporter), member 11                      | Slc39a11 | 0.65628266 |

|                                                                  |            |            |
|------------------------------------------------------------------|------------|------------|
| HD domain containing 2                                           | Hddc2      | 0.65656096 |
| aldolase 1, A isoform                                            | Aldoa      | 0.6566638  |
| EH-domain containing 1                                           | Ehd1       | 0.65669125 |
| cDNA sequence BC024814                                           | BC024814   | 0.6568102  |
| caveolin 2                                                       | Cav2       | 0.6568276  |
| peroxisomal trans-2-enoyl-CoA reductase                          | Pecr       | 0.6582006  |
| bone morphogenetic protein receptor, type 1A                     | Bmpr1a     | 0.6585575  |
| methylthioadenosine phosphorylase                                | Mtap       | 0.6591221  |
| chloride channel 3                                               | Clcn3      | 0.6595445  |
| glyceraldehyde-3-phosphate dehydrogenase                         | Gapdh      | 0.6603607  |
| T-cell receptor gamma chain                                      | Tcrq       | 0.6606122  |
| H1 histone family, member 0                                      | H1f0       | 0.66083425 |
| phosphofructokinase, liver, B-type                               | Pfkl       | 0.6612395  |
| CD55 antigen                                                     | Cd55       | 0.6618952  |
| DNA segment, Chr 13, Wayne State University 177, expressed       | D13Wsu177e | 0.6618975  |
| 3-hydroxy-3-methylglutaryl-Coenzyme A synthase 1                 | Hmgcs1     | 0.6621744  |
| KDEL (Lys-Asp-Glu-Leu) containing 2                              | Kdelc2     | 0.66228944 |
| junction-mediating and regulatory protein                        | Jmy        | 0.6631519  |
| longevity assurance homolog 6 (S. cerevisiae)                    | Lass6      | 0.6632293  |
| furin (paired basic amino acid cleaving enzyme)                  | Furin      | 0.66328263 |
| glycerol phosphate dehydrogenase 2, mitochondrial                | Gpd2       | 0.6641592  |
| phosphoglycerate kinase 1                                        | Pgk1       | 0.6641595  |
| praja1, RING-H2 motif containing                                 | Pja1       | 0.6643498  |
| Fas apoptotic inhibitory molecule 3                              | Faim3      | 0.6647838  |
| oxidative stress induced growth inhibitor 1                      | Osgin1     | 0.6652374  |
| diaphanous homolog 2 (Drosophila)                                | Diap2      | 0.66532815 |
| alanine-glyoxylate aminotransferase 2-like 2                     | Aqxt2l2    | 0.6655763  |
| pseudouridylate synthase 7 homolog (S. cerevisiae)               | Pus7       | 0.6657297  |
| tight junction protein 2                                         | Tjp2       | 0.6658068  |
| ERBB receptor feedback inhibitor 1                               | Errfi1     | 0.6663833  |
| methylenetetrahydrofolate dehydrogenase (NADP+ dependent) 1-like | Mthfd1l    | 0.6665775  |

Table S2.

| <b>GENE_TITLE</b>                                           | <b>GENE_SYMBOL</b> | <b>Fold change</b> |
|-------------------------------------------------------------|--------------------|--------------------|
| B and T lymphocyte associated                               | Btla               | 10.619414          |
| selectin, lymphocyte                                        | Sell               | 10.091135          |
| selectin, lymphocyte                                        | Sell               | 8.449704           |
| membrane-spanning 4-domains, subfamily A, member 4C         | Ms4a4c             | 7.4328146          |
| immunoglobulin heavy chain 6 (heavy chain of IgM)           | Igh-6              | 6.382052           |
| brain expressed gene 6                                      | Bex6               | 5.731997           |
| immunoglobulin heavy chain 6 (heavy chain of IgM)           | Igh-6              | 5.35884            |
| membrane-spanning 4-domains, subfamily A, member 4C         | Ms4a4c             | 5.1635995          |
| CD5 antigen                                                 | Cd5                | 5.0597324          |
| nephroblastoma overexpressed gene                           | Nov                | 5.013391           |
| aldehyde dehydrogenase 2, mitochondrial                     | Aldh2              | 4.9124336          |
| CD6 antigen                                                 | Cd6                | 4.7541776          |
| CD86 antigen                                                | Cd86               | 4.561645           |
| BTB (POZ) domain containing 11                              | Btbd11             | 4.539397           |
| transglutaminase 2, C polypeptide                           | Tgm2               | 4.5231805          |
| chemokine (C-C motif) ligand 5                              | Ccl5               | 4.475936           |
| chemokine (C-X-C motif) receptor 3                          | Cxcr3              | 4.4530644          |
| nephroblastoma overexpressed gene                           | Nov                | 4.3937078          |
| transglutaminase 2, C polypeptide                           | Tgm2               | 4.3589163          |
| chemokine (C motif) ligand 1                                | Xcl1               | 4.2641177          |
| leukemia inhibitory factor                                  | Lif                | 4.1705213          |
| transglutaminase 2, C polypeptide                           | Tgm2               | 4.007677           |
| guanylate nucleotide binding protein 2                      | Gbp2               | 3.9605556          |
| transglutaminase 2, C polypeptide                           | Tgm2               | 3.953977           |
| transglutaminase 2, C polypeptide                           | Tgm2               | 3.9387438          |
| histocompatibility 2, class II, locus DMA                   | H2-DMA             | 3.8232307          |
| palladin, cytoskeletal associated protein                   | Palld              | 3.69089            |
| CD97 antigen                                                | Cd97               | 3.68926            |
| guanylate nucleotide binding protein 2                      | Gbp2               | 3.6888623          |
| leukemia inhibitory factor                                  | Lif                | 3.6421754          |
| SLAM family member 6                                        | Slamf6             | 3.6181192          |
| ubiquitin specific peptidase 18                             | Usp18              | 3.5736878          |
| T-box 21                                                    | Tbx21              | 3.4885643          |
| interferon activated gene 203                               | Ifi203             | 3.4295392          |
| interferon-induced protein with tetratricopeptide repeats 2 | Ifit2              | 3.4124877          |
| interferon-induced protein with tetratricopeptide repeats 1 | Ifit1              | 3.2966535          |
| regulatory factor X, 4 (influences HLA class II expression) | Rfx4               | 3.2882648          |
| interferon-induced protein with tetratricopeptide repeats 3 | Ifit3              | 3.2106006          |
| src-like adaptor                                            | Sla                | 3.2055144          |
| src-like adaptor                                            | Sla                | 3.1840773          |
| LIM domain containing 2                                     | Limd2              | 3.1117184          |
| ADP-ribosyltransferase 2b                                   | Art2b              | 3.034391           |
| transition protein 2                                        | Tnp2               | 3.0090315          |
| tumor necrosis factor receptor superfamily, member 13b      | Tnfrsf13b          | 2.9825096          |
| LIM domain containing 2                                     | Limd2              | 2.955381           |
| CD antigen 27                                               | Cd27               | 2.9141588          |
| tumor necrosis factor (ligand) superfamily, member 10       | Tnfsf10            | 2.8981235          |
| membrane-spanning 4-domains, subfamily A, member 6B         | Ms4a6b             | 2.8884616          |
| arginine glutamic acid dipeptide (RE) repeats               | Rere               | 2.8658037          |
| forkhead box N3                                             | Foxn3              | 2.865565           |
| ATP-binding cassette, sub-family G (WHITE), member 1        | Abcg1              | 2.849893           |
| nucleotide-binding oligomerization domain containing 1      | Nod1               | 2.8327656          |
| interferon activated gene 203                               | Ifi203             | 2.8059402          |
| interferon inducible GTPase 1                               | Ilgp1              | 2.7981086          |
| macrophage activation 2 like                                | Mpa2l              | 2.7967365          |
| interleukin 10 receptor, alpha                              | Il10ra             | 2.789084           |
| F-box protein 39                                            | Fbxo39             | 2.7868335          |
| Z-DNA binding protein 1                                     | Zbp1               | 2.7821443          |
| interferon inducible GTPase 1                               | Ilgp1              | 2.7749214          |
| AF4/FMR2 family, member 3                                   | Aff3               | 2.7639458          |
| transmembrane, prostate androgen induced RNA                | Tmepai             | 2.7379732          |
| plexin C1                                                   | Plxnc1             | 2.7147648          |
| transmembrane protein 50B                                   | Tmem50b            | 2.7139711          |
| plexin C1                                                   | Plxnc1             | 2.680234           |
| acid phosphatase-like 2                                     | Acpl2              | 2.678926           |
| EH-domain containing 3                                      | Ehd3               | 2.637972           |
| EH-domain containing 3                                      | Ehd3               | 2.6224966          |

|                                                             |         |           |
|-------------------------------------------------------------|---------|-----------|
| protein kinase C, beta 1                                    | Prkcb1  | 2.5944998 |
| E2F transcription factor 2                                  | E2f2    | 2.5930355 |
| Z-DNA binding protein 1                                     | Zbp1    | 2.562499  |
| E2F transcription factor 2                                  | E2f2    | 2.541685  |
| membrane-spanning 4-domains, subfamily A, member 6B         | Ms4a6b  | 2.5140698 |
| plexin C1                                                   | Plxnc1  | 2.5124674 |
| receptor transporter protein 4                              | Rtp4    | 2.5041656 |
| tumor necrosis factor (ligand) superfamily, member 10       | Tnfsf10 | 2.4995675 |
| non-catalytic region of tyrosine kinase adaptor protein 2   | Nck2    | 2.4912715 |
| NUAK family, SNF1-like kinase, 2                            | Nuak2   | 2.4753726 |
| membrane bound O-acyltransferase domain containing 1        | Mboat1  | 2.462286  |
| leucine-rich repeats and immunoglobulin-like domains 1      | Lrig1   | 2.4591413 |
| interferon, alpha-inducible protein 27                      | Ifi27   | 2.451375  |
| chemokine (C-C motif) receptor 7                            | Ccr7    | 2.4513328 |
| microsomal glutathione S-transferase 2                      | Mgst2   | 2.4420826 |
| histocompatibility 2, O region alpha locus                  | H2-Oa   | 2.440092  |
| lysosomal trafficking regulator                             | Lyst    | 2.4338033 |
| lectin, galactose binding, soluble 9                        | Lgals9  | 2.4268653 |
| leucine-rich repeats and immunoglobulin-like domains 1      | Lrig1   | 2.4206145 |
| chemokine (C-C motif) ligand 3                              | Ccl3    | 2.4155226 |
| tripartite motif protein 30                                 | Trim30  | 2.4153857 |
| tripartite motif protein 30                                 | Trim30  | 2.4151373 |
| acid phosphatase-like 2                                     | Acpl2   | 2.4129937 |
| tripartite motif protein 30                                 | Trim30  | 2.3981943 |
| macrophage activation 2 like                                | Mpa2l   | 2.3774033 |
| Fas (TNF receptor superfamily member)                       | Fas     | 2.345486  |
| Nur77 downstream gene 1                                     | Ndg1    | 2.3405557 |
| single-stranded DNA binding protein 2                       | Ssbp2   | 2.3265324 |
| lymphotoxin B                                               | Ltb     | 2.324736  |
| protein kinase C, beta 1                                    | Prkcb1  | 2.3122993 |
| Cd200 receptor 4                                            | Cd200r4 | 2.3059757 |
| LIM domain containing 2                                     | Limd2   | 2.3046596 |
| src-like adaptor                                            | Sla     | 2.3032475 |
| transcription factor 7, T-cell specific                     | Tcf7    | 2.298272  |
| forkhead box N3                                             | Foxn3   | 2.2970963 |
| chemokine (C-X-C motif) receptor 4                          | Cxcr4   | 2.2943168 |
| growth factor receptor bound protein 2-associated protein 3 | Gab3    | 2.2805018 |
| IBR domain containing 3                                     | Ibrdc3  | 2.2728927 |
| methyltransferase like 7A                                   | Mettl7a | 2.2651017 |
| immunity-related GTPase family, M                           | Irgm    | 2.2549195 |
| actinin alpha 2                                             | Actn2   | 2.2434254 |
| CD9 antigen                                                 | Cd9     | 2.2318513 |
| phosphodiesterase 4B, cAMP specific                         | Pde4b   | 2.2313092 |
| palladin, cytoskeletal associated protein                   | Palld   | 2.2229395 |
| cathepsin S                                                 | Ctss    | 2.2204633 |
| transmembrane, prostate androgen induced RNA                | Tmepai  | 2.2179077 |
| inositol 1,4,5-triphosphate receptor 2                      | Itpr2   | 2.2136383 |
| thymocyte selection-associated HMG box gene                 | Tox     | 2.2101214 |
| SH3-domain binding protein 5 (BTK-associated)               | Sh3bp5  | 2.2076557 |
| signal transducer and activator of transcription 1          | Stat1   | 2.194591  |
| G protein-coupled receptor 137B                             | Gpr137b | 2.1919265 |
| anthrax toxin receptor 2                                    | Antxr2  | 2.1904688 |
| CD300 antigen like family member F                          | Cd300lf | 2.1885211 |
| Scm-like with four mbt domains 2                            | Sfmbt2  | 2.182194  |
| forkhead box N3                                             | Foxn3   | 2.1800656 |
| tumor necrosis factor (ligand) superfamily, member 10       | Tnfsf10 | 2.1748228 |
| programmed cell death 4                                     | Pdcd4   | 2.1687653 |
| interferon gamma receptor 2                                 | Ifngr2  | 2.1625934 |
| transducin (beta)-like 1X-linked receptor 1                 | Tbl1xr1 | 2.1496983 |
| synaptic nuclear envelope 2                                 | Syne2   | 2.1474395 |
| early growth response 3                                     | Egr3    | 2.1474044 |
| cysteine-rich protein 1 (intestinal)                        | Crip1   | 2.1408753 |
| CD68 antigen                                                | Cd68    | 2.130869  |
| TAP binding protein-like                                    | Tapbpl  | 2.1219664 |
| Nur77 downstream gene 2                                     | Ndg2    | 2.120972  |
| signal transducer and activator of transcription 1          | Stat1   | 2.1204815 |
| thymidylate kinase family LPS-inducible member              | Tyki    | 2.1026874 |
| methyltransferase like 7A                                   | Mettl7a | 2.101616  |



|                                                                                              |         |           |
|----------------------------------------------------------------------------------------------|---------|-----------|
| calcium/calmodulin-dependent protein kinase ID                                               | Camk1d  | 2.1000671 |
| vesicle-associated membrane protein 5                                                        | Vamp5   | 2.0998156 |
| pleckstrin homology, Sec7 and coiled-coil domains 1                                          | Pscd1   | 2.0906556 |
| insulin-like growth factor binding protein 4                                                 | Igfbp4  | 2.0829415 |
| methyltransferase like 7A                                                                    | Mettl7a | 2.0828688 |
| nuclear receptor coactivator 3                                                               | Ncoa3   | 2.0741558 |
| CD86 antigen                                                                                 | Cd86    | 2.0719166 |
| thymocyte selection-associated HMG box gene                                                  | Tox     | 2.0698056 |
| SAM domain and HD domain, 1                                                                  | Samhd1  | 2.0687954 |
| ATP-binding cassette, sub-family G (WHITE), member 3                                         | Abcg3   | 2.0641596 |
| granzyme K                                                                                   | Gzmk    | 2.063929  |
| nuclear factor, erythroid derived 2, like 2                                                  | Nfe2l2  | 2.0560915 |
| carbohydrate sulfotransferase 2                                                              | Chst2   | 2.0530057 |
| mitogen-activated protein kinase 12                                                          | Mapk12  | 2.0518193 |
| interferon regulatory factor 1                                                               | Irf1    | 2.0367014 |
| caspase 1                                                                                    | Casp1   | 2.0351908 |
| membrane-spanning 4-domains, subfamily A, member 6D                                          | Ms4a6d  | 2.0320349 |
| receptor accessory protein 3                                                                 | Reep3   | 2.0299    |
| G-protein signalling modulator 2 (AGS3-like, C. elegans)                                     | Gpsm2   | 2.0297675 |
| mitogen-activated protein kinase 11                                                          | Mapk11  | 2.02859   |
| ST8 alpha-N-acetyl-neuraminidase alpha-2,8-sialyltransferase 4                               | St8sia4 | 2.0195322 |
| granzyme M (lymphocyte met-ase 1)                                                            | Gzmm    | 2.016845  |
| tripartite motif protein 12                                                                  | Trim12  | 2.0157309 |
| human immunodeficiency virus type I enhancer binding protein 2                               | Hivep2  | 2.0066543 |
| T-cell specific GTPase                                                                       | Tgtp    | 2.0027227 |
| ankyrin repeat and BTB (POZ) domain containing 2                                             | Abtb2   | 1.999063  |
| serine/threonine kinase 10                                                                   | Stk10   | 1.9969306 |
| myelin basic protein                                                                         | Mbp     | 1.9920989 |
| hect domain and RLD 5                                                                        | Herc5   | 1.9881866 |
| tripartite motif protein 21                                                                  | Trim21  | 1.9868852 |
| signal transducer and activator of transcription 1                                           | Stat1   | 1.9866577 |
| GTPase, IMAP family member 4                                                                 | Gimap4  | 1.984285  |
| arylsulfatase B                                                                              | Arsb    | 1.984058  |
| ADP-ribosyltransferase 4                                                                     | Art4    | 1.9834151 |
| unc-5 homolog C (C. elegans)-like                                                            | Unc5cl  | 1.9832071 |
| schlafen 1                                                                                   | Slfn1   | 1.9822553 |
| interferon inducible GTPase 2                                                                | Ilgp2   | 1.9811001 |
| H2A histone family, member V                                                                 | H2afv   | 1.9810762 |
| LON peptidase N-terminal domain and ring finger 3                                            | Lonrf3  | 1.9795263 |
| poly (ADP-ribose) polymerase family, member 12                                               | Parp12  | 1.975999  |
| guanylate nucleotide binding protein 3                                                       | Gbp3    | 1.9759091 |
| MAD homolog 3 (Drosophila)                                                                   | Smad3   | 1.9688662 |
| spindlin family, member 2                                                                    | Spin2   | 1.9654967 |
| tumor necrosis factor (ligand) superfamily, member 8                                         | Tnfsf8  | 1.9650519 |
| GTPase, IMAP family member 4                                                                 | Gimap4  | 1.9623187 |
| cathepsin E                                                                                  | Ctse    | 1.9614267 |
| killer cell lectin-like receptor subfamily K, member 1                                       | Klrk1   | 1.9595485 |
| DEXH (Asp-Glu-X-His) box polypeptide 58                                                      | Dhx58   | 1.9533328 |
| Max dimerization protein 3                                                                   | Mxd3    | 1.9470203 |
| interferon gamma inducible protein 47                                                        | Ifi47   | 1.9452164 |
| signal transducer and activator of transcription 1                                           | Stat1   | 1.9449311 |
| SAM domain and HD domain, 1                                                                  | Samhd1  | 1.9425747 |
| ATPase, Class V, type 10D                                                                    | Atp10d  | 1.9407734 |
| insulin-like growth factor binding protein 4                                                 | Igfbp4  | 1.9404325 |
| pleckstrin homology domain containing, family A (phosphoinositide binding specific) member 1 | Plekha1 | 1.9397705 |
| myeloid/lymphoid or mixed lineage-leukemia translocation to 3 homolog (Drosophila)           | Mllt3   | 1.9319512 |
| PHD finger protein 15                                                                        | Phf15   | 1.9248236 |
| Nur77 downstream gene 2                                                                      | Ndg2    | 1.9240229 |
| nuclear receptor coactivator 3                                                               | Ncoa3   | 1.9238851 |
| zinc finger CCCH type containing 12D                                                         | Zc3h12d | 1.923839  |
| suppression of tumorigenicity 14 (colon carcinoma)                                           | St14    | 1.9202745 |
| interferon gamma induced GTPase                                                              | Igtp    | 1.9108638 |
| ring finger protein 213                                                                      | Rnf213  | 1.9107894 |
| arginyl aminopeptidase (aminopeptidase B)-like 1                                             | Rnpepl1 | 1.9088702 |
| DEAD (Asp-Glu-Ala-Asp) box polypeptide 6                                                     | Ddx6    | 1.9007452 |
| Max dimerization protein 3                                                                   | Mxd3    | 1.8995222 |
| CCAAT/enhancer binding protein (C/EBP), beta                                                 | Cebpb   | 1.8987012 |
| RAR-related orphan receptor alpha                                                            | Rora    | 1.8984373 |

|                                                                                    |           |           |
|------------------------------------------------------------------------------------|-----------|-----------|
| killer cell lectin-like receptor family E member 1                                 | Klre1     | 1.8982183 |
| signaling lymphocytic activation molecule family member 1                          | Slamf1    | 1.8973227 |
| coiled coil domain containing 28B                                                  | Ccdc28b   | 1.8933862 |
| schlafen 2                                                                         | Slfn2     | 1.8905532 |
| coronin 7                                                                          | Coro7     | 1.8889136 |
| intraflagellar transport 57 homolog (Chlamydomonas)                                | ift57     | 1.8887681 |
| interferon gamma receptor 1                                                        | Ifngr1    | 1.8803297 |
| abhydrolase domain containing 8                                                    | Abhd8     | 1.8779308 |
| acyltransferase like 2                                                             | Ayt12     | 1.8768325 |
| coronin 7                                                                          | Coro7     | 1.8731018 |
| myeloid/lymphoid or mixed lineage-leukemia translocation to 3 homolog (Drosophila) | Mllt3     | 1.8728472 |
| RAB37, member of RAS oncogene family                                               | Rab37     | 1.8702458 |
| IBR domain containing 3                                                            | Ibrdc3    | 1.8691689 |
| transmembrane protein 2                                                            | Tmem2     | 1.867998  |
| sulfatase 2                                                                        | Sulf2     | 1.8655231 |
| poly (ADP-ribose) polymerase family, member 3                                      | Parp3     | 1.8620294 |
| Tripartite motif protein 34                                                        | Trim34    | 1.8610309 |
| nuclear factor of kappa light chain gene enhancer in B-cells inhibitor, alpha      | Nfkbia    | 1.8608109 |
| platelet/endothelial cell adhesion molecule 1                                      | Pecam1    | 1.8579917 |
| special AT-rich sequence binding protein 1                                         | Satb1     | 1.8574874 |
| glucocorticoid induced transcript 1                                                | Glcc1     | 1.8562063 |
| G protein-coupled receptor 18                                                      | Gpr18     | 1.8547204 |
| ISG15 ubiquitin-like modifier                                                      | Isg15     | 1.8531569 |
| killer cell lectin-like receptor subfamily A, member 10                            | Klra10    | 1.8497196 |
| ectodermal-neural cortex 1                                                         | Enc1      | 1.8469944 |
| deltex 3-like (Drosophila)                                                         | Dtx3l     | 1.8411797 |
| ankyrin repeat and BTB (POZ) domain containing 2                                   | Abtb2     | 1.8318725 |
| peroxisome proliferative activated receptor, gamma, coactivator 1 beta             | Ppargc1b  | 1.8304619 |
| interferon regulatory factor 7                                                     | Irf7      | 1.8303773 |
| cytidine monophospho-N-acetylneuraminic acid hydroxylase                           | Cmah      | 1.8286178 |
| interleukin 17 receptor A                                                          | Il17ra    | 1.8270477 |
| leucine-rich repeats and calponin homology (CH) domain containing 1                | Lrch1     | 1.8255506 |
| membrane-spanning 4-domains, subfamily A, member 6D                                | Ms4a6d    | 1.8242993 |
| zinc finger protein 238                                                            | Zfp238    | 1.8210074 |
| RAB37, member of RAS oncogene family                                               | Rab37     | 1.8208538 |
| cytotoxic and regulatory T cell molecule                                           | Crtam     | 1.8206991 |
| arylsulfatase B                                                                    | Arsb      | 1.8199348 |
| deleted in lymphocytic leukemia, 7                                                 | Dleu7     | 1.8106891 |
| interferon activated gene 203                                                      | Ifi203    | 1.8077433 |
| ATP-binding cassette, sub-family G (WHITE), member 3                               | Abcg3     | 1.8062297 |
| transducin (beta)-like 1X-linked receptor 1                                        | Tbl1xr1   | 1.8056209 |
| dual specificity phosphatase 10                                                    | Dusp10    | 1.8052435 |
| nuclear factor of kappa light chain gene enhancer in B-cells inhibitor, alpha      | Nfkbia    | 1.8032756 |
| death associated protein-like 1                                                    | Dapl1     | 1.8016176 |
| B-cell leukemia/lymphoma 11B                                                       | Bcl11b    | 1.8003155 |
| nuclear receptor coactivator 2                                                     | Ncoa2     | 1.80002   |
| paraoxonase 3                                                                      | Pon3      | 1.7972856 |
| adenosine deaminase, RNA-specific                                                  | Adar      | 1.7943243 |
| PX domain containing serine/threonine kinase                                       | Pxk       | 1.7923391 |
| SH2 domain protein 1A                                                              | Sh2d1a    | 1.7895427 |
| transformation related protein 53 inducible nuclear protein 1                      | Trp53inp1 | 1.7869955 |
| interferon activated gene 203                                                      | Ifi203    | 1.7864294 |
| adenosine deaminase                                                                | Ada       | 1.7838671 |
| cyclin-dependent kinase inhibitor 2C (p18, inhibits CDK4)                          | Cdkn2c    | 1.7836916 |
| placenta-specific 8                                                                | Plac8     | 1.7816631 |
| protein kinase, AMP-activated, gamma 2 non-catalytic subunit                       | Prkag2    | 1.7810653 |
| nuclear receptor interacting protein 1                                             | Nrip1     | 1.780809  |
| DEP domain containing 1B                                                           | Depdc1b   | 1.7708092 |
| zinc finger, CCHC domain containing 11                                             | Zcchc11   | 1.7674632 |
| GTPase, IMAP family member 7                                                       | Gimap7    | 1.7673886 |
| ST3 beta-galactoside alpha-2,3-sialyltransferase 6                                 | St3gal6   | 1.7650107 |
| establishment of cohesion 1 homolog 2 (S. cerevisiae)                              | Esco2     | 1.7643586 |
| protein phosphatase 1, regulatory (inhibitor) subunit 12A                          | Ppp1r12a  | 1.7625729 |
| prostaglandin E receptor 4 (subtype EP4)                                           | Ptger4    | 1.7619696 |
| glutathione S-transferase kappa 1                                                  | Gstk1     | 1.760703  |
| myeloid/lymphoid or mixed lineage-leukemia translocation to 3 homolog (Drosophila) | Mllt3     | 1.7582033 |
| chemokine (C-C motif) ligand 4                                                     | Ccl4      | 1.7573771 |
| hypoxia inducible factor 1, alpha subunit                                          | Hif1a     | 1.7542458 |

|                                                                               |           |           |
|-------------------------------------------------------------------------------|-----------|-----------|
| CCAAT/enhancer binding protein (C/EBP), beta                                  | Cebpb     | 1.7518582 |
| coronin 7                                                                     | Coro7     | 1.7514504 |
| argininosuccinate synthetase 1                                                | Ass1      | 1.7512642 |
| poly (ADP-ribose) polymerase family, member 11                                | Parp11    | 1.7501827 |
| M-phase phosphoprotein 9                                                      | Mphosph9  | 1.7486533 |
| RAB3A interacting protein                                                     | Rab3ip    | 1.7451543 |
| Max dimerization protein 3                                                    | Mxd3      | 1.7445246 |
| CD84 antigen                                                                  | Cd84      | 1.743946  |
| kinesin family member 1B                                                      | Kif1b     | 1.7430208 |
| membrane-spanning 4-domains, subfamily A, member 4B                           | Ms4a4b    | 1.7409074 |
| stromal interaction molecule 2                                                | Stim2     | 1.7395463 |
| deleted in lymphocytic leukemia, 2                                            | Dleu2     | 1.736916  |
| ninein                                                                        | Nin       | 1.7367991 |
| UbiE-YGHL1 fusion protein                                                     | Ubie      | 1.7318088 |
| myeloid/lymphoid or mixed-lineage leukemia 1                                  | MLL1      | 1.7316934 |
| serine (or cysteine) peptidase inhibitor, clade A, member 3G                  | Serpina3g | 1.7314974 |
| nuclear antigen Sp100                                                         | Sp100     | 1.731438  |
| receptor accessory protein 1                                                  | Reep1     | 1.7309115 |
| guanylate binding protein 6                                                   | Gbp6      | 1.7306103 |
| interleukin 15 receptor, alpha chain                                          | Il15ra    | 1.7304174 |
| hect domain and RLD 5                                                         | Herc5     | 1.7301996 |
| solute carrier family 14 (urea transporter), member 1                         | Slc14a1   | 1.7257173 |
| tripartite motif protein 21                                                   | Trim21    | 1.725544  |
| A kinase (PRKA) anchor protein 2                                              | Akap2     | 1.7243452 |
| special AT-rich sequence binding protein 1                                    | Satb1     | 1.723027  |
| signal transducer and activator of transcription 2                            | Stat2     | 1.7229054 |
| phosphodiesterase 4B, cAMP specific                                           | Pde4b     | 1.7206657 |
| leucine-rich repeats and calponin homology (CH) domain containing 1           | Lrch1     | 1.7184627 |
| caspase 7                                                                     | Casp7     | 1.7157513 |
| breast cancer 1                                                               | Brca1     | 1.7157085 |
| E2F transcription factor 7                                                    | E2f7      | 1.7141374 |
| kelch repeat and BTB (POZ) domain containing 11                               | Kbtbd11   | 1.7119784 |
| forkhead box P1                                                               | Foxp1     | 1.7118692 |
| B-cell leukemia/lymphoma 11B                                                  | Bcl11b    | 1.7113452 |
| suppressor of cytokine signaling 2                                            | Socs2     | 1.7108902 |
| lysosomal acid lipase A                                                       | Lipa      | 1.7108012 |
| endothelial differentiation sphingolipid G-protein-coupled receptor 1         | Edg1      | 1.7072171 |
| chemokine (C-C motif) receptor 2                                              | Ccr2      | 1.7071922 |
| limb-bud and heart                                                            | Lbh       | 1.705567  |
| interferon activated gene 203                                                 | Ifi203    | 1.7055196 |
| cyclin F                                                                      | Ccnf      | 1.704696  |
| nuclear receptor subfamily 3, group C, member 1                               | Nr3c1     | 1.7043703 |
| tescalcin                                                                     | Tesc      | 1.7034131 |
| Rab6 interacting protein 1                                                    | Rab6ip1   | 1.7025754 |
| adaptor-related protein complex 1, sigma 2 subunit                            | Ap1s2     | 1.7010038 |
| apolipoprotein B editing complex 3                                            | Apobec3   | 1.6997046 |
| crystallin, lambda 1                                                          | Cryl1     | 1.6995469 |
| B-cell leukemia/lymphoma 11B                                                  | Bcl11b    | 1.6962289 |
| ST3 beta-galactoside alpha-2,3-sialyltransferase 6                            | St3gal6   | 1.6961287 |
| transmembrane protein 106A                                                    | Tmem106a  | 1.6958495 |
| ninjurin 2                                                                    | Ninj2     | 1.6953497 |
| ATPase, aminophospholipid transporter (APLT), class I, type 8A, member 1      | Atp8a1    | 1.692892  |
| RAD52 motif 1                                                                 | Rdm1      | 1.6926118 |
| transmembrane protein 2                                                       | Tmem2     | 1.6920573 |
| G protein-coupled receptor kinase 5                                           | Grk5      | 1.691612  |
| receptor accessory protein 3                                                  | Reep3     | 1.6912491 |
| PHD finger protein 19                                                         | Phf19     | 1.6912394 |
| eukaryotic translation initiation factor 2-alpha kinase 2                     | Eif2ak2   | 1.6907791 |
| interleukin 6 signal transducer                                               | Il6st     | 1.6906564 |
| proline rich 11                                                               | Prr11     | 1.6890656 |
| cold inducible RNA binding protein                                            | Cirbp     | 1.6877627 |
| rho/rac guanine nucleotide exchange factor (GEF) 18                           | Arhgef18  | 1.6848052 |
| quaking                                                                       | Qk        | 1.6832054 |
| nuclear factor of kappa light chain gene enhancer in B-cells inhibitor, alpha | Nfkbia    | 1.6804541 |
| janus kinase and microtubule interacting protein 1                            | Jakmip1   | 1.6803963 |
| chemokine (C-C motif) receptor 2                                              | Ccr2      | 1.6791991 |
| GTPase, IMAP family member 9                                                  | Gimap9    | 1.6764927 |
| protein-tyrosine sulfotransferase 1                                           | Tpst1     | 1.67549   |

|                                                                                          |           |           |
|------------------------------------------------------------------------------------------|-----------|-----------|
| coronin 7                                                                                | Coro7     | 1.6739265 |
| kinesin family member 11                                                                 | Kif11     | 1.672852  |
| B-cell leukemia/lymphoma 11B                                                             | Bcl11b    | 1.672588  |
| cysteine rich transmembrane BMP regulator 1 (chordin like)                               | Crim1     | 1.6712704 |
| interleukin 10 receptor, beta                                                            | Il10rb    | 1.6702745 |
| suppressor of cytokine signaling 2                                                       | Socs2     | 1.667961  |
| caspase 7                                                                                | Casp7     | 1.6664379 |
| nuclear antigen Sp100                                                                    | Sp100     | 1.6663762 |
| proteasome (prosome, macropain) subunit, beta type 9 (large multifunctional peptidase 2) | Psbm9     | 1.664434  |
| chemokine (C-C motif) receptor 2                                                         | Ccr2      | 1.6620532 |
| acyltransferase like 2                                                                   | Aytl2     | 1.661519  |
| RAS guanyl releasing protein 1                                                           | Rasgrp1   | 1.6613077 |
| slingshot homolog 2 (Drosophila)                                                         | Ssh2      | 1.6602621 |
| histocompatibility 2, M region locus 3                                                   | H2-M3     | 1.6598192 |
| centrosomal protein 55                                                                   | Cep55     | 1.6580993 |
| deltex 3-like (Drosophila)                                                               | Dtx3l     | 1.6575675 |
| DEAD (Asp-Glu-Ala-Asp) box polypeptide 6                                                 | Ddx6      | 1.6557289 |
| cell division cycle 2-like 6 (CDK8-like)                                                 | Cdc2l6    | 1.6551535 |
| CDC42 small effector 2                                                                   | Cdc42se2  | 1.6546559 |
| angel homolog 2 (Drosophila)                                                             | Angel2    | 1.6536969 |
| Hematopoietic SH2 domain containing                                                      | Hsh2d     | 1.6534498 |
| copine III                                                                               | Cpne3     | 1.6534468 |
| ubiquitin-activating enzyme E1-like                                                      | Ube1l     | 1.6521982 |
| hect domain and RLD 5                                                                    | Herc5     | 1.6521606 |
| Dnaj (Hsp40) homolog, subfamily A, member 4                                              | Dnaja4    | 1.6520694 |
| ST8 alpha-N-acetyl-neuraminide alpha-2,8-sialyltransferase 1                             | St8sia1   | 1.6519382 |
| coronin 7                                                                                | Coro7     | 1.649238  |
| CDC42 effector protein (Rho GTPase binding) 3                                            | Cdc42ep3  | 1.6487346 |
| adaptor-related protein complex 1, sigma 2 subunit                                       | Ap1s2     | 1.6474146 |
| insulin-like growth factor binding protein 4                                             | Igfbp4    | 1.6455252 |
| PYD and CARD domain containing                                                           | Pycard    | 1.6453353 |
| protein kinase C, alpha                                                                  | Prkca     | 1.6432676 |
| Fas ligand (TNF superfamily, member 6)                                                   | Fasl      | 1.6430215 |
| protein phosphatase 1M                                                                   | Ppm1m     | 1.6426451 |
| general transcription factor IIIC, polypeptide 5                                         | Gtf3c5    | 1.6424557 |
| BCL2-like 11 (apoptosis facilitator)                                                     | Bcl2l11   | 1.6415789 |
| gamma-glutamyl hydrolase                                                                 | Ggh       | 1.6414477 |
| poly (ADP-ribose) polymerase family, member 14                                           | Parp14    | 1.6413742 |
| lysosomal acid lipase A                                                                  | Lipa      | 1.6408367 |
| prostaglandin E receptor 4 (subtype EP4)                                                 | Ptger4    | 1.6385676 |
| eukaryotic translation initiation factor 2-alpha kinase 2                                | Eif2ak2   | 1.637581  |
| AP2 associated kinase 1                                                                  | Aak1      | 1.6349064 |
| huntingtin interacting protein 1                                                         | Hip1      | 1.6348871 |
| transducin (beta)-like 1X-linked receptor 1                                              | Tbl1xr1   | 1.6334363 |
| cyclin G2                                                                                | Ccng2     | 1.6326293 |
| interleukin 18 binding protein                                                           | Il18bp    | 1.6292183 |
| forkhead box M1                                                                          | Foxm1     | 1.628499  |
| forkhead box P1                                                                          | Foxp1     | 1.6272917 |
| mitogen activated protein kinase kinase kinase 5                                         | Map3k5    | 1.6267174 |
| interleukin 15 receptor, alpha chain                                                     | Il15ra    | 1.6258672 |
| AT rich interactive domain 4A (Rbp1 like)                                                | Arid4a    | 1.6257839 |
| BCL2-like 11 (apoptosis facilitator)                                                     | Bcl2l11   | 1.6247671 |
| mitogen activated protein kinase kinase kinase 3                                         | Map3k3    | 1.6223027 |
| protein phosphatase 1, regulatory (inhibitor) subunit 12A                                | Ppp1r12a  | 1.6218783 |
| dermatan sulfate epimerase                                                               | Dse       | 1.621579  |
| mitogen activated protein kinase kinase kinase 3                                         | Map3k3    | 1.6213486 |
| acyltransferase like 2                                                                   | Aytl2     | 1.621344  |
| acyl-Coenzyme A binding domain containing 4                                              | Acbd4     | 1.6200002 |
| forkhead box P1                                                                          | Foxp1     | 1.6189914 |
| SNF related kinase                                                                       | Snrk      | 1.6181847 |
| protein kinase D2                                                                        | Prkd2     | 1.6174477 |
| tumor necrosis factor, alpha-induced protein 8-like 1                                    | Tnfaip8l1 | 1.6168463 |
| inositol polyphosphate-1-phosphatase                                                     | Inpp1     | 1.6163372 |
| histone deacetylase 5                                                                    | Hdac5     | 1.6163098 |
| promyelocytic leukemia                                                                   | Pml       | 1.6151987 |
| leucine rich repeat containing 16                                                        | Lrrc16    | 1.6151863 |
| ADP-ribosylation factor-like 6 interacting protein 1                                     | Arl6ip1   | 1.6144089 |
| myelin basic protein                                                                     | Mbp       | 1.6143079 |

|                                                                          |           |           |
|--------------------------------------------------------------------------|-----------|-----------|
| RAB, member of RAS oncogene family-like 4                                | Rabl4     | 1.6139159 |
| twinfilin, actin-binding protein, homolog 2 (Drosophila)                 | Twf2      | 1.6135231 |
| crystallin, lambda 1                                                     | Cryl1     | 1.6123766 |
| BCL2-like 11 (apoptosis facilitator)                                     | Bcl2l11   | 1.6107539 |
| receptor accessory protein 3                                             | Reep3     | 1.6106697 |
| SH3-binding kinase 1                                                     | Sbk1      | 1.6106496 |
| coagulation factor II (thrombin) receptor-like 1                         | F2rl1     | 1.6102066 |
| copine III                                                               | Cpne3     | 1.609412  |
| LIM domain containing preferred translocation partner in lipoma          | Lpp       | 1.6081166 |
| RAB19, member RAS oncogene family                                        | Rab19     | 1.6073036 |
| TAP binding protein                                                      | Tapbp     | 1.6070119 |
| tubulin, alpha 8                                                         | Tuba8     | 1.6065993 |
| nuclear receptor coactivator 2                                           | Ncoa2     | 1.6056538 |
| CD28 antigen                                                             | Cd28      | 1.6050243 |
| immunoglobulin kappa chain, constant region                              | Igk-C     | 1.603151  |
| nuclear receptor subfamily 3, group C, member 1                          | Nr3c1     | 1.6031024 |
| RAB GTPase activating protein 1-like                                     | Rabgap1l  | 1.6024107 |
| heterogeneous nuclear ribonucleoprotein L-like                           | Hnrpll    | 1.6003261 |
| nuclear receptor subfamily 3, group C, member 1                          | Nr3c1     | 1.5997434 |
| protein kinase D2                                                        | Prkd2     | 1.5994096 |
| Fas ligand (TNF superfamily, member 6)                                   | Fasl      | 1.599227  |
| CD82 antigen                                                             | Cd82      | 1.5975598 |
| A kinase (PRKA) anchor protein 2                                         | Akap2     | 1.5968407 |
| CDC42 effector protein (Rho GTPase binding) 3                            | Cdc42ep3  | 1.5967492 |
| transducin (beta)-like 1X-linked receptor 1                              | Tbl1xr1   | 1.5966711 |
| tripartite motif protein 34                                              | Trim34    | 1.5952499 |
| kinesin family member 11                                                 | Kif11     | 1.591871  |
| BCL2-like 11 (apoptosis facilitator)                                     | Bcl2l11   | 1.5917677 |
| myosin light chain 2, precursor lymphocyte-specific                      | Mylc2pl   | 1.590096  |
| protein kinase C, epsilon                                                | Prkce     | 1.5900844 |
| early growth response 2                                                  | Egr2      | 1.5899472 |
| palmitoyl-protein thioesterase 1                                         | Ppt1      | 1.5893383 |
| opioid growth factor receptor-like 1                                     | Ogfrl1    | 1.5885546 |
| spermatogenesis associated 13                                            | Spata13   | 1.5876133 |
| transporter 1, ATP-binding cassette, sub-family B (MDR/TAP)              | Tap1      | 1.5872873 |
| regulator of G-protein signaling 2                                       | Rgs2      | 1.5861312 |
| interferon (alpha and beta) receptor 2                                   | Ifnar2    | 1.5842426 |
| ATPase, aminophospholipid transporter (APLT), class I, type 8A, member 1 | Atp8a1    | 1.5835123 |
| pellino 1                                                                | Peli1     | 1.5821836 |
| BCL2-like 11 (apoptosis facilitator)                                     | Bcl2l11   | 1.5814348 |
| 2'-5' oligoadenylate synthetase 3                                        | Oas3      | 1.5794592 |
| katanin p60 (ATPase-containing) subunit A1                               | Katna1    | 1.5794473 |
| ribosomal protein L39-like                                               | Rpl39l    | 1.5793556 |
| transmembrane and coiled-coil domains 4                                  | Tmco4     | 1.5793314 |
| poly (ADP-ribose) polymerase family, member 3                            | Parp3     | 1.5776919 |
| tetraspanin 32                                                           | Tspan32   | 1.5771898 |
| forkhead box P1                                                          | Foxp1     | 1.5771534 |
| pannexin 1                                                               | Panx1     | 1.5767586 |
| transducin (beta)-like 1X-linked receptor 1                              | Tbl1xr1   | 1.575815  |
| Rho GTPase activating protein 25                                         | Arhgap25  | 1.5746773 |
| expressed sequence AW112010                                              | AW112010  | 1.5742941 |
| Sp110 nuclear body protein                                               | Sp110     | 1.5738015 |
| breast cancer 1                                                          | Brca1     | 1.5736234 |
| stathmin 1                                                               | Stmn1     | 1.5724498 |
| coiled-coil domain containing 97                                         | Ccdc97    | 1.5716994 |
| DnaJ (Hsp40) homolog, subfamily C, member 1                              | Dnajc1    | 1.5713466 |
| forkhead box M1                                                          | Foxm1     | 1.5703892 |
| loss of heterozygosity, 11, chromosomal region 2, gene A homolog (human) | Loh11cr2a | 1.5701382 |
| ectodermal-neural cortex 1                                               | Enc1      | 1.5699768 |
| Scl/Tal1 interrupting locus                                              | Stil      | 1.5686854 |
| TAP binding protein                                                      | Tapbp     | 1.5677881 |
| schlafen 3                                                               | Slf3      | 1.5669444 |
| kinesin family member 1B                                                 | Kif1b     | 1.5664992 |
| centromere protein F                                                     | Cenpf     | 1.5663698 |
| glucocorticoid induced transcript 1                                      | Glcci1    | 1.5661352 |
| interferon-induced protein 35                                            | Ifi35     | 1.5656953 |
| coiled-coil domain containing 109B                                       | Ccdc109b  | 1.5652887 |
| ADP-ribosylation factor-like 6 interacting protein 1                     | Arl6ip1   | 1.5650189 |

|                                                                      |          |           |
|----------------------------------------------------------------------|----------|-----------|
| neuronal PAS domain protein 2                                        | Npas2    | 1.5648361 |
| histocompatibility 2, class II, locus DMA                            | H2-DMA   | 1.5628287 |
| membrane associated guanylate kinase, WW and PDZ domain containing 3 | Magi3    | 1.5616869 |
| triple functional domain (TPRF interacting)                          | Trio     | 1.5616294 |
| SAM domain and HD domain, 1                                          | Samhd1   | 1.5613611 |
| cyclin G2                                                            | Ccng2    | 1.5606153 |
| interferon (alpha and beta) receptor 2                               | Ifnar2   | 1.5601571 |
| promyelocytic leukemia                                               | Pml      | 1.5591983 |
| microtubule associated serine/threonine kinase-like                  | Mastl    | 1.5591636 |
| DnaJ (Hsp40) homolog, subfamily C, member 1                          | Dnajc1   | 1.5561073 |
| RAS p21 protein activator 1                                          | Rasa1    | 1.5541948 |
| transcription factor 19                                              | Tcf19    | 1.5541004 |
| protein phosphatase 1, regulatory (inhibitor) subunit 12A            | Ppp1r12a | 1.5539614 |
| slingshot homolog 2 (Drosophila)                                     | Ssh2     | 1.5538785 |
| DNA2 DNA replication helicase 2-like (yeast)                         | Dna2l    | 1.5537987 |
| nuclear receptor subfamily 3, group C, member 1                      | Nr3c1    | 1.5524416 |
| DENN/MADD domain containing 1C                                       | Dennd1c  | 1.5522455 |
| BRCA1 interacting protein C-terminal helicase 1                      | Brip1    | 1.5505961 |
| signal transducer and activator of transcription 2                   | Stat2    | 1.5504586 |
| interferon (alpha and beta) receptor 2                               | Ifnar2   | 1.5497862 |
| development and differentiation enhancing factor 2                   | Ddef2    | 1.5496687 |
| raftlin lipid raft linker 1                                          | Rftn1    | 1.5495481 |
| interferon dependent positive acting transcription factor 3 gamma    | Isgf3g   | 1.5490471 |
| cyclin F                                                             | Ccnf     | 1.5490187 |
| dipeptidylpeptidase 4                                                | Dpp4     | 1.5485027 |
| tubby-like protein 3                                                 | Tulp3    | 1.5484914 |
| centromere protein F                                                 | Cenpf    | 1.5484455 |
| suppressor of cytokine signaling 1                                   | Socs1    | 1.5483437 |
| kinesin family member 2C                                             | Kif2c    | 1.547937  |
| acid phosphatase 5, tartrate resistant                               | Acp5     | 1.5467469 |
| zinc finger protein, multitype 1                                     | Zfp1     | 1.5459856 |
| zinc finger protein 817                                              | Zfp817   | 1.5458584 |
| ST8 alpha-N-acetyl-neuraminide alpha-2,8-sialyltransferase 1         | St8sia1  | 1.5456866 |
| protein kinase C and casein kinase substrate in neurons 1            | Pacsin1  | 1.5450029 |
| engulfment and cell motility 1, ced-12 homolog (C. elegans)          | Elmo1    | 1.5428627 |
| tripartite motif-containing 44                                       | Trim44   | 1.5428042 |
| C-type lectin domain family 2, member i                              | Clec2i   | 1.5427369 |
| tetraspanin 13                                                       | Tspan13  | 1.5426338 |
| A kinase (PRKA) anchor protein 13                                    | Akap13   | 1.5424538 |
| non-SMC condensin II complex, subunit D3                             | Ncapd3   | 1.5424517 |
| spindlin 1                                                           | Spin1    | 1.5415308 |
| kelch repeat and BTB (POZ) domain containing 11                      | Kbtbd11  | 1.540523  |
| protein tyrosine phosphatase, non-receptor type 9                    | Ptpn9    | 1.5389239 |
| BAT2 domain containing 1                                             | Bat2d    | 1.5385547 |
| Cdc42 GTPase-activating protein                                      | Cdgap    | 1.5371581 |
| mitogen activated protein kinase kinase kinase 3                     | Map3k3   | 1.5357822 |
| pyrin and HIN domain family, member 1                                | Pyhin1   | 1.5355837 |
| ADP-ribosylation factor-like 6 interacting protein 1                 | Arl6ip1  | 1.5354928 |
| phosphodiesterase 6D, cGMP-specific, rod, delta                      | Pde6d    | 1.5348915 |
| cell division cycle 2-like 6 (CDK8-like)                             | Cdc2l6   | 1.5347614 |
| CD28 antigen                                                         | Cd28     | 1.5331883 |
| LIM domain containing preferred translocation partner in lipoma      | Lpp      | 1.5322154 |
| TSPY-like 3                                                          | Tspyl3   | 1.5317202 |
| twinfilin, actin-binding protein, homolog 2 (Drosophila)             | Twf2     | 1.5315182 |
| Dipeptidylpeptidase 4                                                | Dpp4     | 1.5309135 |
| seven in absentia 1A                                                 | Siah1a   | 1.5302467 |
| early growth response 2                                              | Egr2     | 1.529518  |
| RAR-related orphan receptor alpha                                    | Rora     | 1.5291137 |
| protein phosphatase 1K (PP2C domain containing)                      | Ppm1k    | 1.5287164 |
| tetraspanin 13                                                       | Tspan13  | 1.528304  |
| nuclear receptor coactivator 7                                       | Ncoa7    | 1.5282198 |
| BRCA1 associated RING domain 1                                       | Bard1    | 1.5278986 |
| RAB GTPase activating protein 1-like                                 | Rabgap1l | 1.5276946 |
| E2F transcription factor 8                                           | E2f8     | 1.5274099 |
| stathmin 1                                                           | Stmn1    | 1.5271466 |
| RAS p21 protein activator 1                                          | Rasa1    | 1.5269173 |
| SLAM family member 6                                                 | Slamf6   | 1.5264776 |
| POU domain, class 6, transcription factor 1                          | Pou6f1   | 1.526224  |

|                                                                                       |           |           |
|---------------------------------------------------------------------------------------|-----------|-----------|
| H2A histone family, member V                                                          | H2afv     | 1.5249535 |
| pleckstrin homology domain containing, family G (with RhoGef domain) member 2         | Plekkg2   | 1.5245478 |
| beta-1,4-N-acetyl-galactosaminyl transferase 1                                        | B4galnt1  | 1.5242913 |
| ataxia telangiectasia mutated homolog (human)                                         | Atm       | 1.524087  |
| kinesin family member 2C                                                              | Kif2c     | 1.522636  |
| Werner syndrome homolog (human)                                                       | Wrn       | 1.5222743 |
| solute carrier family 9 (sodium/hydrogen exchanger), isoform 3 regulator 1            | Slc9a3r1  | 1.522111  |
| transmembrane protein 173                                                             | Tmem173   | 1.52156   |
| limb-bud and heart                                                                    | Lbh       | 1.5213585 |
| centaurin, delta 1                                                                    | Centd1    | 1.520291  |
| lymphocyte antigen 6 complex, locus C1                                                | Ly6c1     | 1.5201616 |
| transmembrane protein 173                                                             | Tmem173   | 1.5196265 |
| alpha thalassemia/mental retardation syndrome X-linked homolog (human)                | Atrx      | 1.5191835 |
| S100P binding protein                                                                 | S100pbp   | 1.5186918 |
| GTPase, IMAP family member 7                                                          | Gimap7    | 1.51737   |
| solute carrier family 9 (sodium/hydrogen exchanger), isoform 3 regulator 1            | Slc9a3r1  | 1.5173373 |
| Werner syndrome homolog (human)                                                       | Wrn       | 1.5165712 |
| RAS p21 protein activator 1                                                           | Rasa1     | 1.515185  |
| endothelial cell-specific molecule 1                                                  | Esm1      | 1.5150598 |
| tubulin, gamma complex associated protein 6                                           | Tubgcp6   | 1.5138952 |
| serine carboxypeptidase 1                                                             | Scpep1    | 1.5126352 |
| triple functional domain (PTPRF interacting)                                          | Trio      | 1.5125456 |
| homeodomain interacting protein kinase 1                                              | Hipk1     | 1.5121641 |
| protein tyrosine phosphatase, receptor type, J                                        | Ptprj     | 1.5115849 |
| kelch-like 24 (Drosophila)                                                            | Klhl24    | 1.5114713 |
| Centromere protein A                                                                  | Cenpa     | 1.5113944 |
| forkhead box P1                                                                       | Foxp1     | 1.5110192 |
| cell division cycle associated 5                                                      | Cdca5     | 1.5107392 |
| toll-like receptor 1                                                                  | Tlr1      | 1.510131  |
| IKAROS family zinc finger 3                                                           | Ikzf3     | 1.5100708 |
| claspin homolog (Xenopus laevis)                                                      | Clspn     | 1.5098026 |
| TBC1 domain family, member 16                                                         | Tbc1d16   | 1.5095147 |
| claspin homolog (Xenopus laevis)                                                      | Clspn     | 1.5093397 |
| ASF1 anti-silencing function 1 homolog B (S. cerevisiae)                              | Asf1b     | 1.5093386 |
| AF4/FMR2 family, member 1                                                             | Aff1      | 1.5066215 |
| nuclear factor of kappa light polypeptide gene enhancer in B-cells inhibitor, epsilon | Nfkbie    | 1.5058831 |
| potassium large conductance calcium-activated channel, subfamily M, beta member 4     | Kcnmb4    | 1.5051306 |
| 2-cell-stage, variable group, member 3                                                | Tcstv3    | 1.5048141 |
| phosphatidylinositol transfer protein, cytoplasmic 1                                  | Pitpnc1   | 1.5046889 |
| DAZ interacting protein 1                                                             | Dzip1     | 1.5041173 |
| Janus kinase 2                                                                        | Jak2      | 1.5037851 |
| cytoskeleton associated protein 2-like                                                | Ckap2l    | 1.5031108 |
| UDP-Gal:betaGlcNAc beta 1,4-galactosyltransferase, polypeptide 4                      | B4galt4   | 1.5030804 |
| Rho guanine nucleotide exchange factor (GEF) 3                                        | Arhgef3   | 1.5028819 |
| solute carrier family 9 (sodium/hydrogen exchanger), isoform 3 regulator 1            | Slc9a3r1  | 1.502878  |
| lysosomal acid lipase A                                                               | Lipa      | 1.5022496 |
| T cell receptor alpha variable 12d-1                                                  | Trav12d-1 | 1.5019844 |
| transporter 2, ATP-binding cassette, sub-family B (MDR/TAP)                           | Tap2      | 1.5015705 |
| B-cell scaffold protein with ankyrin repeats 1                                        | Bank1     | 1.5009409 |
| centromere protein N                                                                  | Cenpn     | 1.5006924 |
